# Supplementary material for: Amorphous CoB nanoarray as a high-efficiency electrocatalyst for nitrite reduction to ammonia
Source: Royal Society of Chemistry journal article supplement (doi:10.1039/d2qi01363k), 2022-01-01
Supplement: d2qi01363k1.pdf [file d2qi01363k1.pdf]

## Electronic Supplementary Information

### Experimental section

**Materials:** Sodium nitrite ( $\text{NaNO}_2$ , 99.9%), ammonium chloride ( $\text{NH}_4\text{Cl}$ , 99.5%), sodium hydroxide ( $\text{NaOH}$ , 98%), ethanol ( $\text{C}_2\text{H}_6\text{O}$ , 99.9%), sodium salicylate ( $\text{C}_7\text{H}_5\text{NaO}_3$ , 99.5%), trisodium citrate dihydrate ( $\text{C}_6\text{H}_5\text{Na}_3\text{O}_7 \cdot 2\text{H}_2\text{O}$ , 99%), p-dimethylaminobenzaldehyde ( $\text{C}_9\text{H}_{11}\text{NO}$ , 99%), sodium nitroferricyanide dihydrate ( $\text{C}_5\text{FeN}_6\text{Na}_2\text{O} \cdot 2\text{H}_2\text{O}$ , 99%) and sodium hypochlorite solution ( $\text{NaClO}$ , 5%) were purchased from Aladdin Co., Ltd. (Shanghai, China). Sulfuric acid ( $\text{H}_2\text{SO}_4$ , 99%), hydrogen peroxide ( $\text{H}_2\text{O}_2$ , 99%), hydrochloric acid ( $\text{HCl}$ , 99%), hydrazine monohydrate ( $\text{N}_2\text{H}_4 \cdot \text{H}_2\text{O}$ , 99%) and ethyl alcohol ( $\text{C}_2\text{H}_5\text{OH}$ , 99%) were bought from Beijing Chemical Corporation. (China). Ti plate (thickness is 0.2 mm, 99.9%) was purchased from Qingyuan Metal Materials Co., Ltd (Xingtai, China). All reagents used in this work were analytical grade without further purification.

**Preparation of  $\text{TiO}_2$  nanosheets array:** Firstly, Ti plate ( $2.0 \times 3.0 \text{ cm}^2$ ) was cleaned by ultrasonication in acetone, ethanol, and water for 15 min, respectively. Then, Ti plate was put into a 50 mL of Teflon-lined autoclave containing 35 mL of 5 M NaOH solution and heated in an electric oven at 180 °C for 24 h. Subsequently, cation exchange of  $\text{Na}^+$  to  $\text{H}^+$  was carried out by immersing the sample into 1 M HCl for 1 h to obtain  $\text{H}_2\text{Ti}_2\text{O}_5 \cdot \text{H}_2\text{O}$  nanosheet array, followed by annealing at 500 °C for 2 h.

**Preparation of  $\text{CoB}@\text{TiO}_2$  nanoarray:** Amorphous CoB was magnetron sputtered onto as-prepared  $\text{TiO}_2$  nanoarray. The sputtering chamber was evacuated to about  $8 \times 10^{-4}$  Pa before the sputtering deposition. Ar (50 sccm) was injected to the chamber with a total pressure of 4 Pa and the sputtering voltage was 310 V (direct current voltage). The bias voltage was 60 V and the sputtering time was 5 min. CoB on Ti plate was prepared by the same procedure. The sputtering machine (Z/CM GXZ 05-2020) is purchased from Chengdu CM Photoelectric technology Co., Ltd.

**Characterizations:** XRD data were acquired from a LabX XRD-6100 X-ray diffractometer with a  $\text{Cu K}\alpha$  radiation (40 kV, 30 mA) of wavelength 0.154 nm

(SHIMADZU, Japan). SEM images were collected on a Gemini SEM 300 scanning electron microscope (ZEISS, Germany) at an accelerating voltage of 5 kV. TEM images were acquired on a HITACHI H-8100 electron microscopy (Hitachi, Tokyo, Japan) operated at 200 kV. XPS measurements were performed on an ESCALABMK II X-ray photoelectron spectrometer using Mg as the exciting source. The absorbance data of spectrophotometer was measured on UV-vis spectrophotometer (SHIMADZU UV-2700). Gaseous products from nitrate reduction reaction were determined by gas chromatography (GC) with SHIMADZU GC-2014 gas chromatograph.

**Electrochemical measurements:** All electrochemical measurements were carried out on the CHI660E electrochemical workstation (Chenhua, Shanghai). A three-electrode system with an H-type electrolytic cell separated by a Nafion 117 membrane, working electrode of a piece of CoB@TiO<sub>2</sub>/TP as, reference electrode of Ag/AgCl, and counter electrode of graphite rod are used for the electrochemical tests under magnetic stirring (250 rpm). Electrolyte is 0.1 M Na<sub>2</sub>SO<sub>4</sub> with/without 400 ppm NO<sub>2</sub><sup>-</sup>. The potentials reported in this work were converted to the reversible hydrogen electrode (RHE) via the equation of  $E(\text{vs. RHE}) = E(\text{vs. Ag/AgCl}) + 0.197 \text{ V} + 0.059 \times \text{pH}$ .

**Determination of NH<sub>3</sub>:** NH<sub>3</sub> concentration was spectrophotometrically determined by the indophenol blue method (the obtained electrolyte was diluted 20 times). In detail, 4 mL diluted electrolyte was mixed with 50 μL oxidizing solution containing NaClO (4.5%) and NaOH (0.75 M), 500 μL coloring solution containing C<sub>7</sub>H<sub>5</sub>O<sub>3</sub>Na (0.4 M) and NaOH (0.32 M), and 50 μL 1 wt% Na<sub>2</sub>Fe(CN)<sub>5</sub>NO·2H<sub>2</sub>O aqueous solution for 1 h in darkness. The concentration-absorbance curve ( $y = 0.4506x + 0.0238$ ,  $R^2 = 0.9998$ ) was prepared from the UV-vis spectra of the standard NH<sub>4</sub>Cl solutions with known concentrations of 0, 1, 2, 3, 4 mL<sup>-1</sup> in 0.1 M Na<sub>2</sub>SO<sub>4</sub>.

**Determination of N<sub>2</sub>H<sub>4</sub>:** N<sub>2</sub>H<sub>4</sub> was estimated by the Watt and Chrisp method. The color reagent was a solution of 18.15 mg mL<sup>-1</sup> of C<sub>9</sub>H<sub>11</sub>NO in the mixed solvent of HCl and C<sub>2</sub>H<sub>5</sub>OH (V/V: 1/10). In detail, 2 mL electrolyte was added into 2 mL color reagent for 15 min under stirring. The absorbance of such solution was measured to

quantify the hydrazine yields by the standard curve of hydrazine ( $y = 0.6878x + 0.1066$ ,  $R^2 = 0.9998$ ).

**Determination of N<sub>2</sub>, H<sub>2</sub>:** H<sub>2</sub> was quantified by GC.

**Calculations of the m<sub>NH<sub>3</sub></sub>, FE and NH<sub>3</sub> yield:**

The amount of NH<sub>3</sub> (m<sub>NH<sub>3</sub></sub>) was calculated by the following equation:

$$m_{\text{NH}_3} = [\text{NH}_3] \times V$$

FE of NH<sub>3</sub> formation was calculated by the following equation:

$$\text{FE} = (6 \times F \times [\text{NH}_3] \times V) / (M_{\text{NH}_3} \times Q) \times 100\%$$

NH<sub>3</sub> yield rate is calculated using the following equation:

$$\text{NH}_3 \text{ yield} = ([\text{NH}_3] \times V) / (M_{\text{NH}_3} \times t \times A)$$

Where F is the Faradic constant (96485 C mol<sup>-1</sup>), [NH<sub>3</sub>] is the NH<sub>3</sub> concentration, V is the volume of electrolyte in the anode compartment (40 mL), M<sub>NH<sub>3</sub></sub> is the molar mass of NH<sub>3</sub> molecule, Q is the total quantity of applied electricity, t is the electrolysis time (1 h) and A is the geometric area of working electrode (0.5 × 0.5 cm<sup>2</sup>).

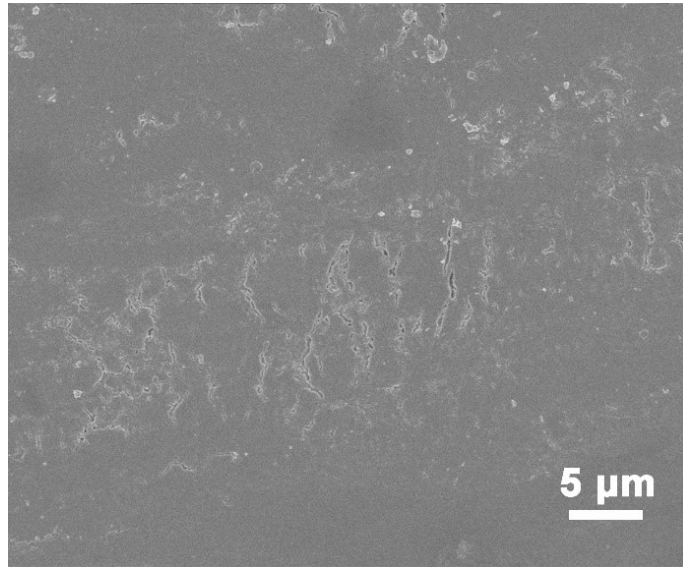

**Fig. S1.** SEM image of TP.

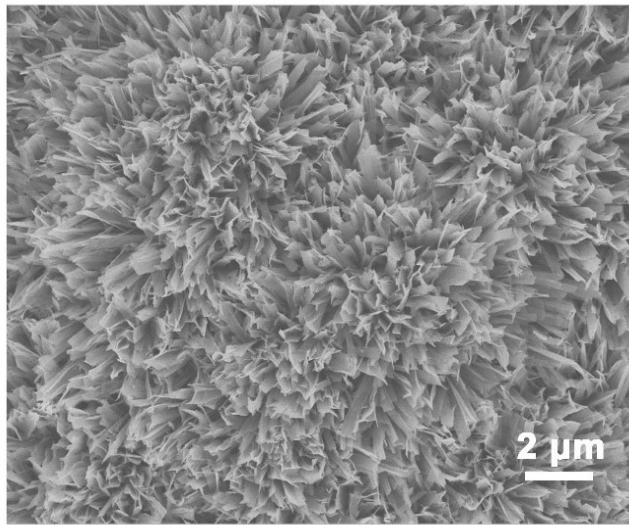

**Fig. S2.** SEM image of TiO<sub>2</sub>/TP.

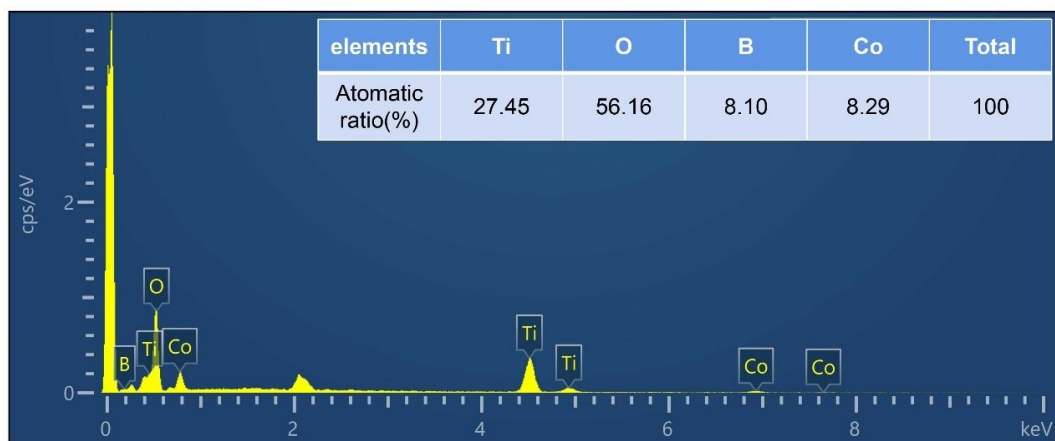

**Fig. S3.** EDX spectrum of CoB@TiO<sub>2</sub>/TP.

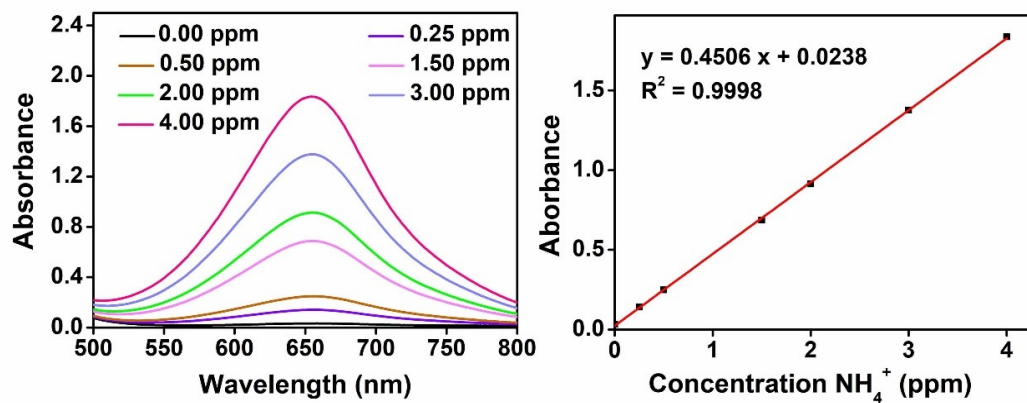

**Fig. S4.** (a) UV-vis spectra and (b) corresponding calibration curve for calculation of  $\text{NH}_4^+$  concentration.

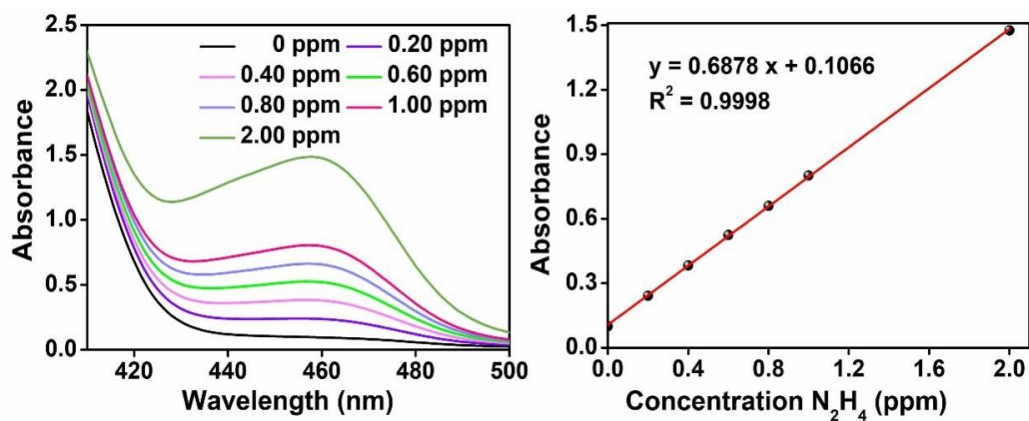

**Fig. S5.** (a) UV-vis spectra and (b) corresponding calibration curve for calculation of  $N_2H_4$  concentration.



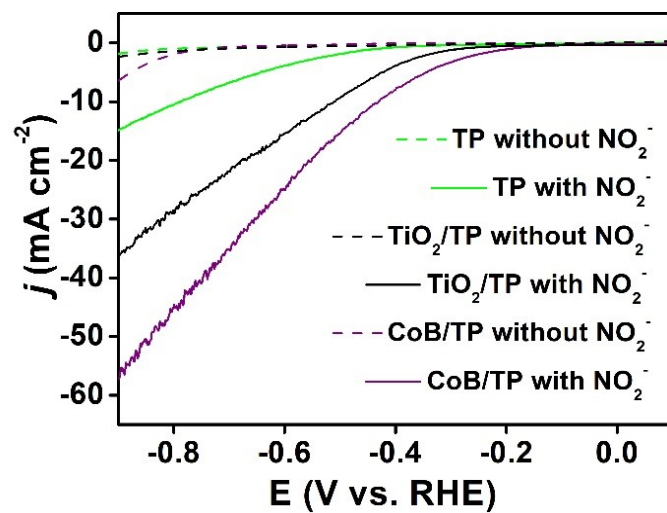

**Fig. S6.** LSV curves of CoB/TP, TiO<sub>2</sub>/TP, and bare TP in 0.1 M Na<sub>2</sub>SO<sub>4</sub> with/without 400 ppm NO<sub>2</sub><sup>-</sup>.

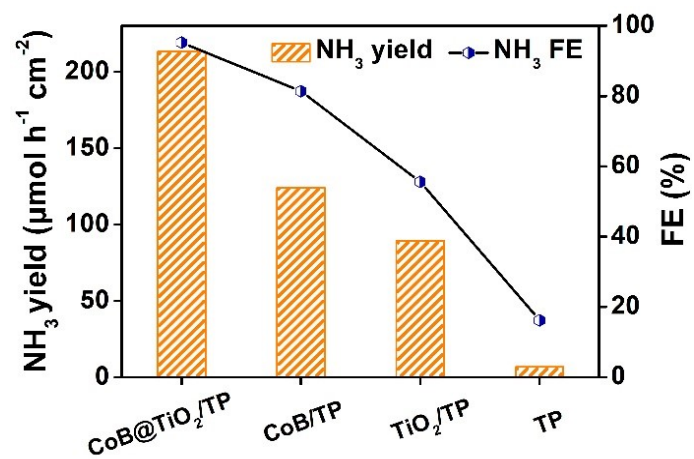

**Fig. S7.** NH<sub>3</sub> yields and FEs of CoB@TiO<sub>2</sub>/TP, CoB/TP, TiO<sub>2</sub>/TP, and bare TP in 0.1 M Na<sub>2</sub>SO<sub>4</sub> containing 400 ppm NO<sub>2</sub><sup>-</sup> at -0.7 V.

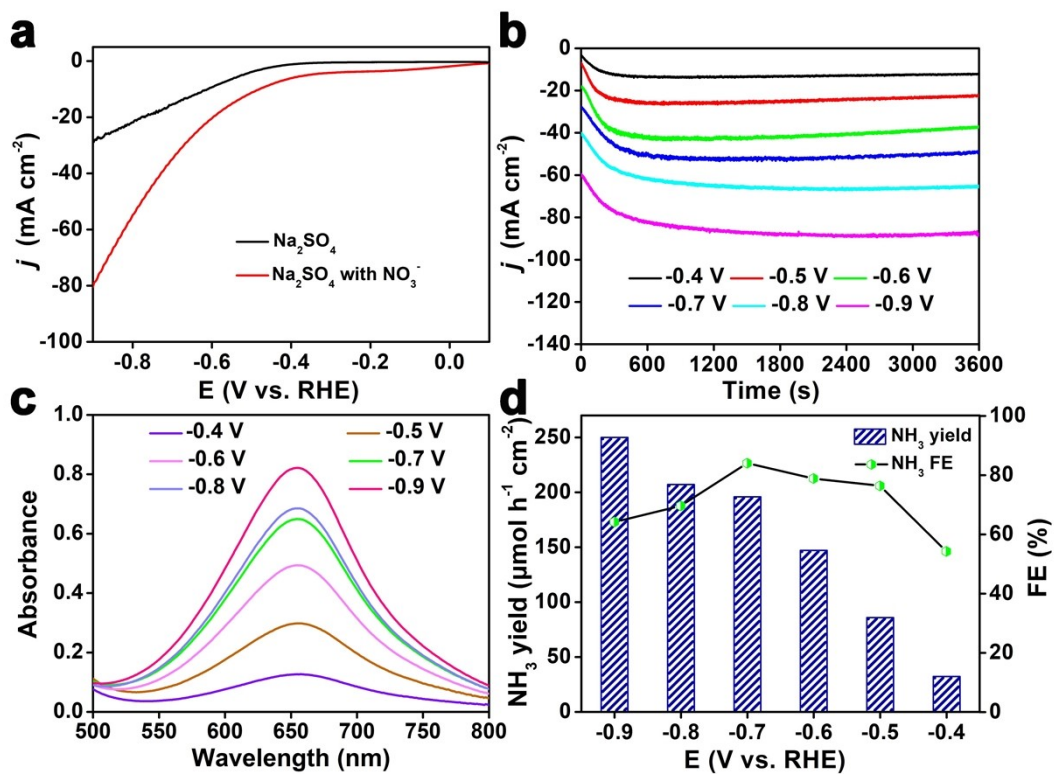

**Fig. S8.** NO<sub>3</sub><sup>-</sup> reduction reaction performance measurements of CoB@TiO<sub>2</sub>/TP: (a) LSV curves in 0.1 M Na<sub>2</sub>SO<sub>4</sub> with and without 400 ppm NO<sub>3</sub><sup>-</sup>. (b) Chronoamperometry curves and (c) corresponding UV-vis spectra at a potential range from -0.4 V to -0.9 V. (d) NH<sub>3</sub> yields and FEs at given potentials.

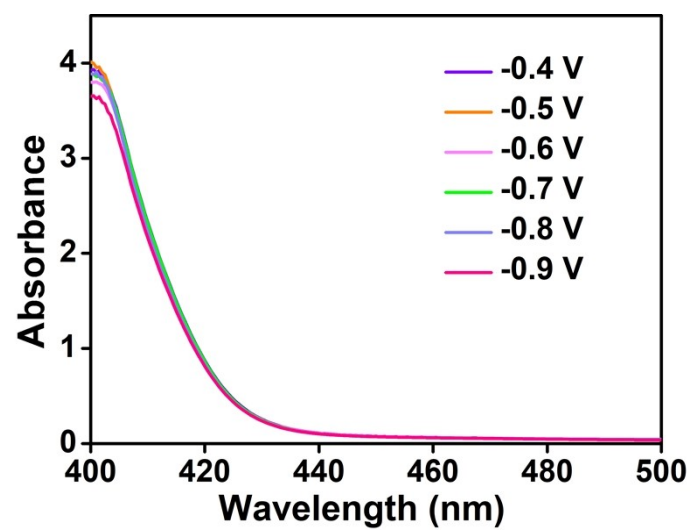

Fig. S9. UV-vis spectra of  $N_2H_4$  detection.

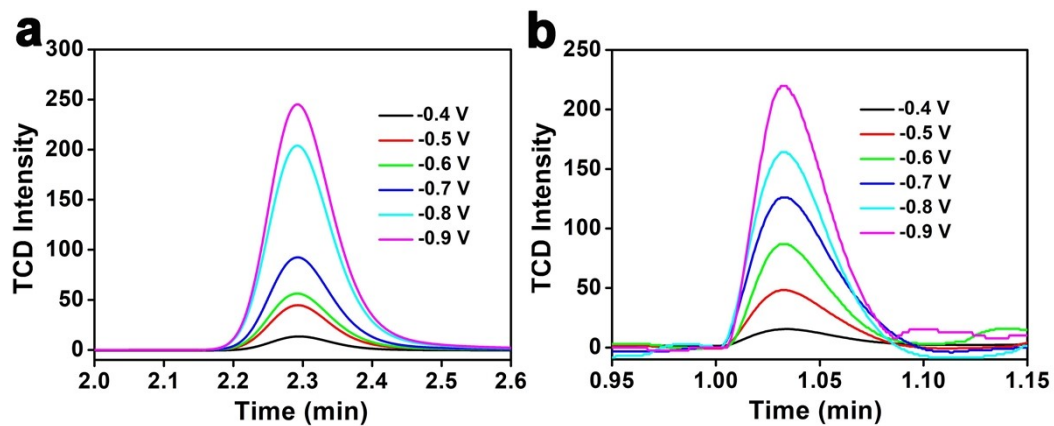

**Fig. S10.** Chromatograph curves of (a) H<sub>2</sub> and (b) N<sub>2</sub> detected by GC at each given potential.

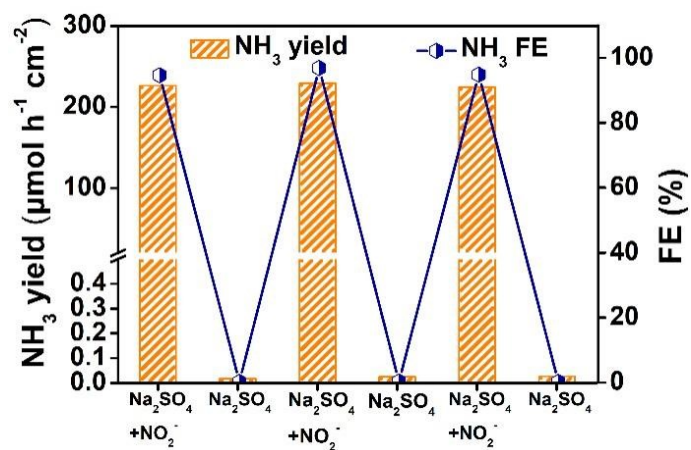

**Fig. S11.** NH<sub>3</sub> yields and FEs during alternating cycle tests between NO<sub>2</sub><sup>-</sup>-containing and NO<sub>2</sub><sup>-</sup>-free 0.1 M Na<sub>2</sub>SO<sub>4</sub> at -0.7 V.

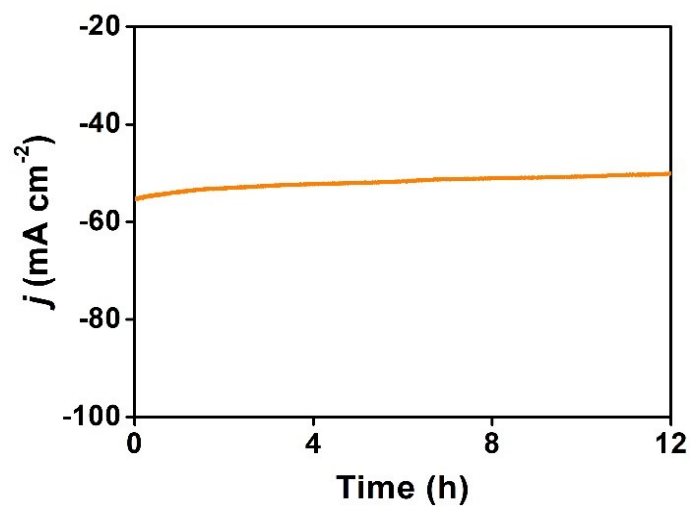

**Fig. S12.** Chronoamperometry curve of CoB@TiO<sub>2</sub>/TP during 12-h stability test.

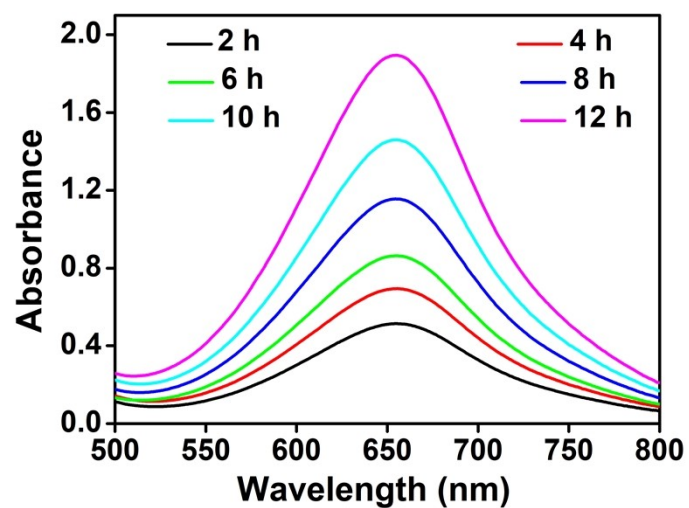

**Fig. S13.** Time-dependent UV-vis spectra of  $\text{NH}_4^+$  during long-term stability test.



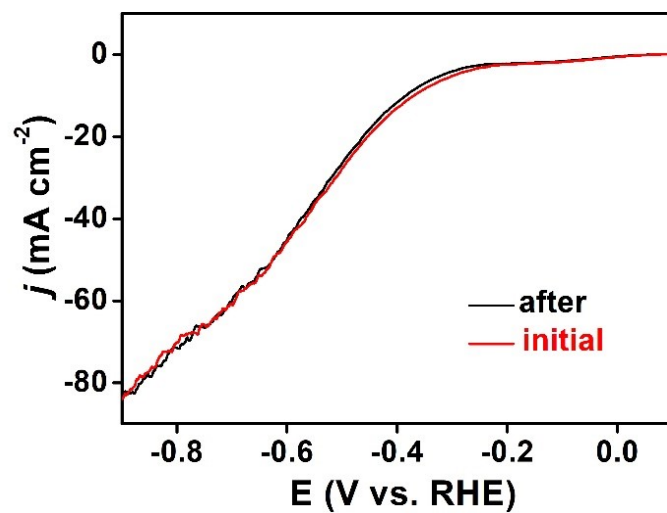

**Fig. S14.** LSV curves of CoB@TiO<sub>2</sub>/TP before and after long-term stability test.

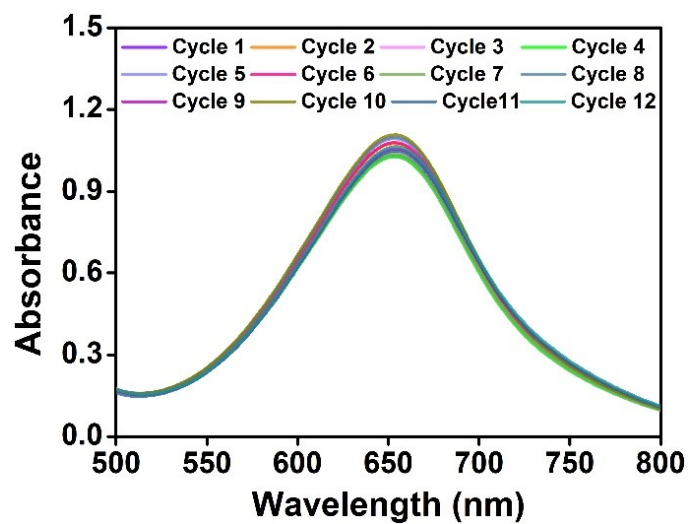

**Fig. S15.** UV-vis spectra of CoB@TiO<sub>2</sub>/TP for cycling tests in 0.1 M Na<sub>2</sub>SO<sub>4</sub> containing 400 ppm NO<sub>2</sub><sup>-</sup> at -0.7 V.

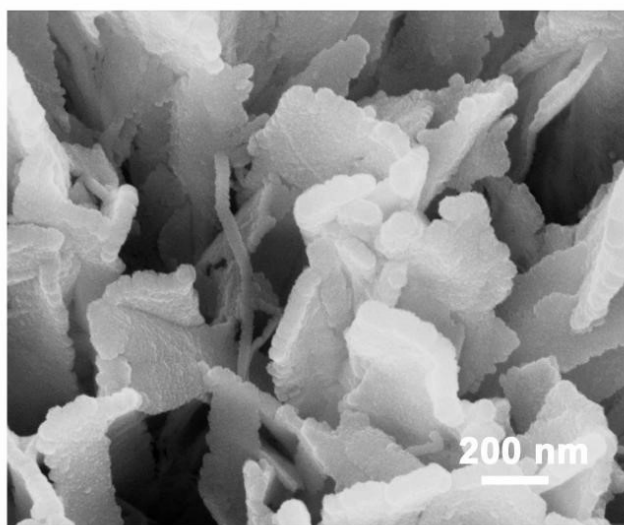

**Fig. S16.** SEM image of CoB@TiO<sub>2</sub>/TP after durability test.

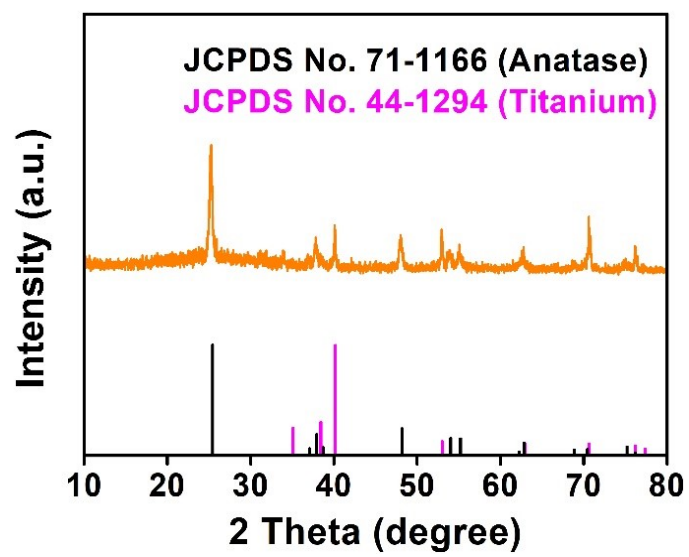

Fig. S17. XRD pattern of CoB@TiO<sub>2</sub>/TP after durability test.

**Table S1.** Comparison of the catalytic performances of CoB@TiO<sub>2</sub>/TP with the other reported NO<sub>2</sub><sup>-</sup>RR and NO<sub>3</sub><sup>-</sup>RR electrocatalysts.

| Catalyst                               | Electrolyte                                                           | NH <sub>3</sub> yield                                            | FE (%)     | Ref.      |
|----------------------------------------|-----------------------------------------------------------------------|------------------------------------------------------------------|------------|-----------|
| CoB@TiO <sub>2</sub> /TP               | 0.1 M Na <sub>2</sub> SO <sub>4</sub><br>(400 ppm NaNO <sub>2</sub> ) | 233.1 μmol h <sup>-1</sup><br>cm <sup>-2</sup>                   | 95.2       | This work |
|                                        | 0.1 M Na <sub>2</sub> SO <sub>4</sub><br>(400 ppm NaNO <sub>3</sub> ) | 195.9 μmol h <sup>-1</sup><br>cm <sup>-2</sup>                   | 84         |           |
| MnO <sub>2</sub> nanoarray             | 0.1 M Na <sub>2</sub> SO <sub>4</sub><br>(0.2 M NaNO <sub>2</sub> )   | 8.6 × 10 <sup>-12</sup> μmol<br>h <sup>-1</sup> cm <sup>-2</sup> | 6          | 1         |
| Ni-NSA-V <sub>Ni</sub>                 | 0.2 M Na <sub>2</sub> SO <sub>4</sub><br>(200 ppm NaNO <sub>2</sub> ) | 235.5 μmol h <sup>-1</sup><br>cm <sup>-2</sup>                   | 88.9       | 2         |
| Cobalt-tripeptide<br>complex           | 1.0 M MOPS<br>(1.0 M NaNO <sub>2</sub> )                              | 1.1 μmol h <sup>-1</sup><br>cm <sup>-2</sup>                     | 90 ± 3     | 3         |
| Ni <sub>2</sub> P/NF                   | 0.1 M PBS<br>(200 ppm NaNO <sub>2</sub> )                             | 158.1 ± 5.4<br>μmol h <sup>-1</sup> cm <sup>-2</sup>             | 90.2 ± 3.0 | 4         |
| CoP NA/TM                              | 0.1 M PBS<br>(500 ppm NaNO <sub>2</sub> )                             | 132.7 ± 3.0<br>μmol h <sup>-1</sup> cm <sup>-2</sup>             | 90.0 ± 2.3 | 5         |
| Cu <sub>3</sub> P NA/CF                | 0.1 M PBS<br>(0.1 M NaNO <sub>2</sub> )                               | 95.5 ± 2.1 μmol<br>h <sup>-1</sup> cm <sup>-2</sup>              | 91.2 ± 2.5 | 6         |
| Cu <sub>80</sub> Ni <sub>20</sub>      | 1.0 M NaOH<br>(20 mM NaNO <sub>2</sub> )                              | /                                                                | 87.6       | 7         |
| Cu phthalocyanine<br>complexes         | 0.1 M KOH<br>(NaNO <sub>2</sub> )                                     | /                                                                | 78         | 8         |
| [Co(DIM)Br <sub>2</sub> ] <sup>+</sup> | 0.1 M NaNO <sub>2</sub>                                               | /                                                                | 88         | 9         |
| FeN <sub>5</sub> H <sub>2</sub>        | 1.0 M MOPS                                                            | /                                                                | 18         | 10        |
| Co <sub>3</sub> O <sub>4</sub> @NiO    | 0.5 M Na <sub>2</sub> SO <sub>4</sub><br>(2.36 mM NaNO <sub>3</sub> ) | /                                                                | 55.0       | 11        |

|                                                   |                                                                                  |                                                                |      |    |
|---------------------------------------------------|----------------------------------------------------------------------------------|----------------------------------------------------------------|------|----|
| Co/CoO NSA                                        | 0.1 M Na <sub>2</sub> SO <sub>4</sub><br>(200 ppm NaNO <sub>3</sub> )            | 194.5 μmol h <sup>-1</sup><br>cm <sup>-2</sup>                 | 93.8 | 12 |
| Co <sub>2</sub> AlO <sub>4</sub>                  | 0.1 M PBS<br>(0.1 M NaNO <sub>3</sub> )                                          | 464.7 μmol h <sup>-1</sup><br>cm <sup>-2</sup>                 | 92.6 | 13 |
| Pd nanodots on Zr-MOF                             | 0.1 M Na <sub>2</sub> SO <sub>4</sub><br>(500 ppm NO <sub>3</sub> <sup>-</sup> ) | 16.99 μmol h <sup>-1</sup><br>mg <sub>cat.</sub> <sup>-1</sup> | 58.1 | 14 |
| Ru <sub>x</sub> O <sub>y</sub> clusters on Ni-MOF | 0.1 M Na <sub>2</sub> SO <sub>4</sub><br>(100 ppm NO <sub>3</sub> <sup>-</sup> ) | 16.1 μmol h <sup>-1</sup><br>mg <sub>cat.</sub> <sup>-1</sup>  | 58.8 | 15 |
| Fe single atom catalyst                           | 0.10 M K <sub>2</sub> SO <sub>4</sub><br>(0.50 M KNO <sub>3</sub> )              | ~1176 μmol h <sup>-1</sup><br>cm <sup>-2</sup>                 | ~75  | 16 |
| Ag@NiO/CC                                         | 0.1 M NaOH<br>(0.1 M NaNO <sub>3</sub> )                                         | 135.1 μmol h <sup>-1</sup><br>cm <sup>-2</sup>                 | 75.8 | 17 |

## References

- 1 R. Wang, Z. Wang, X. Xiang, R. Zhang, X. Shi and X. Sun, MnO<sub>2</sub> nanoarrays: an efficient catalyst electrode for nitrite electroreduction toward sensing and NH<sub>3</sub> synthesis applications, *Chem. Commun.*, 2018, **54**, 10340–10342.
- 2 C. Wang, W. Zhou, Z. Sun, Y. Wang, B. Zhang and Y. Yu, Integrated selective nitrite reduction to ammonia with tetrahydroisoquinoline semi-dehydrogenation over a vacancy-rich Ni bifunctional electrode, *J. Mater. Chem. A*, 2021, **9**, 239–243.
- 3 Y. Guo, J. R. Stroka, B. Kandemir, C. E. Dickerson and K. L. Bren, Cobalt metallopeptide electrocatalyst for the selective reduction of nitrite to ammonium, *J. Am. Chem. Soc.*, 2018, **140**, 16888–16892.
- 4 G. Wen, J. Liang, L. Zhang, T. Li, Q. Liu, X. An, X. Shi, Y. Liu, S. Gao, A. M. Asiri, Y. Luo, Q. Kong and X. Sun, Ni<sub>2</sub>P nanosheet array for high-efficiency electrohydrogenation of nitrite to ammonia at ambient conditions, *J. Colloid Interface Sci.*, 2022, **606**, 1055–1063.
- 5 G. Wen, J. Liang, Q. Liu, T. Li, X. An, F. Zhang, A. A. Alshehri, K. A. Alzahrani, Y. Luo, Q. Kong and X. Sun, Ambient ammonia production via electrocatalytic nitrite reduction catalyzed by a CoP nanoarray, *Nano Res.*, 2022, **15**, 972–977.
- 6 J. Liang, B. Deng, Q. Liu, G. Wen, Q. Liu, T. Li, Y. Luo, A. A. Alshehri, K. A. Alzahrani, D. Ma and X. Sun, High-efficiency electrochemical nitrite reduction to ammonium using a Cu<sub>3</sub>P nanowire array under ambient conditions, *Green Chem.*, 2021, **23**, 5487–5493.
- 7 L. Mattarozzi, S. Cattarin, N. Comisso, P. Guerriero, M. Musiani, L. Vázquez-Gómez and E. Verlato, Electrochemical reduction of nitrate and nitrite in alkaline media at CuNi alloy electrodes, *Electrochim. Acta*, 2013, **89**, 488–496.
- 8 N. Chebotareva and T. Nyokong, Metallophthalocyanine catalysed electroreduction of nitrate and nitrite ions in alkaline media, *J. Appl. Electrochem.*,

- 1997, **27**, 975–981.
- 9 S. Xu, H.-Y. Kwon, D. C. Ashley, C.-H. Chen, E. Jakubikova and J. M. Smith, Intramolecular hydrogen bonding facilitates electrocatalytic reduction of nitrite in aqueous solutions, *Inorg. Chem.*, 2019, **58**, 9443–9451.
  - 10 J. R. Stroka, B. Kandemir, E. M. Matson and K. L. Bren, Electrocatalytic multielectron nitrite reduction in water by an iron complex, *ACS Catal.*, 2020, **10**, 13968–13972.
  - 11 Y. Wang, C. Liu, B. Zhang and Y. Yu, Self-template synthesis of hierarchically structured  $\text{Co}_3\text{O}_4@\text{NiO}$  bifunctional electrodes for selective nitrate reduction and tetrahydroisoquinolines semi-dehydrogenation. *Sci. China Mater.*, 2020, **63**, 2530–2538.
  - 12 Y. Yu, C. Wang, Y. Yu, Y. Wang and B. Zhang, Promoting selective electroreduction of nitrates to ammonia over electron-deficient Co modulated by rectifying schottky contacts. *Sci. China Chem.*, 2020, **63**, 1469–1476.
  - 13 Z. Deng, J. Liang, Q. Liu, C. Ma, L. Xie, L. Yue, Y. Ren, T. Li, Y. Luo, N. Li, B. Tang, A. A. Alshehri, I. Shakir, P. O. Agboola, S. Yan, B. Zheng, J. Du, Q. Kong and X. Sun, High-efficiency ammonia electrosynthesis on self-supported  $\text{Co}_2\text{AlO}_4$  nanoarray in neutral media by selective reduction of nitrate. *Chem. Eng. J.*, 2022, **435**, 135104.
  - 14 M. Jiang, J. Su, X. Song, P. Zhang, M. Zhu, L. Qin, Z. Tie, J.-L. Zuo and Z. Jin, Interfacial reduction nucleation of noble metal nanodots on redox-active metal–organic frameworks for high-efficiency electrocatalytic conversion of nitrate to ammonia, *Nano Lett.* 2022, **22**, 2529–2537.
  - 15 J. Qin, K. Wu, L. Chen, X. Wang, Q. Zhao, B. Liu and Z. Ye, Achieving high selectivity for nitrate electrochemical reduction to ammonia over MOF-supported  $\text{Ru}_x\text{O}_y$  clusters, *J. Mater. Chem. A* 2022, **10**, 3963–3969.
  - 16 Z.-Y. Wu, M. Karamad, X. Yong, Q. Huang, D. A. Cullen, P. Zhu, C. Xia, Q. Xiao, M. Shakouri, F.-Y. Chen, J. Y. Kim, Y. Xia, K. Heck, Y. Hu, M. S. Wong



- ,Q. Li, I. Gates, S. Siahrostami and H. Wang, Electrochemical ammonia synthesis via nitrate reduction on Fe single atom catalyst, *Nat. Commun.* 2021, **12**, 2870.
- 17 Q. Liu, G. Wen, D. Zhao, L. Xie, S. Sun, L. Zhang, Y. Luo, A. A. Alshehri, M. S. Hamdy, Q. Kong and X. Sun, Nitrite reduction over Ag nanoarray electrocatalyst for ammonia synthesis, *J. Colloid Interface Sci.* 2022, **623**, 513–519.
